# Supplementary material for: Examination of Candidate Chromosomal Regions for Type 2 Diabetes Reveals a Susceptibility Locus on Human Chromosome 8p23.1
Source: Oxford University Press journal article supplement (doi:10.2337/diabetes.53.2.486), 2004-02-01
Supplement: 486-sup-pezzolesiappendixa.doc [file 486-sup-pezzolesiappendixa.doc]

# Online Appendix A Description of the Joslin Study on the Genetics of Type 2 Diabetes family

**collection.**

| Pedigree | All  Members | Members  Typed | Affecteds  Typed | Affected Sibships | | | Affected Sib Pairs | Affected Pairs with Kinship k/32 | | | | |
| --- | --- | --- | --- | --- | --- | --- | --- | --- | --- | --- | --- | --- |
| Number | Min | Max | 0 | 1 | 2 | 4 | 8 |
| 1 | 14 | 9 | 3 | 2 | 1 | 2 | 1 | 0 | 0 | 0 | 2 | 1 |
| 2 | 8 | 5 | 4 | 1 | 4 | 4 | 6 | 0 | 0 | 0 | 0 | 6 |
| 3 | 9 | 7 | 3 | 1 | 3 | 3 | 3 | 0 | 0 | 0 | 0 | 3 |
| 4 | 11 | 9 | 5 | 1 | 5 | 5 | 10 | 0 | 0 | 0 | 0 | 10 |
| 5 | 27 | 19 | 5 | 3 | 1 | 2 | 2 | 0 | 0 | 8 | 0 | 2 |
| 6 | 19 | 10 | 8 | 4 | 1 | 4 | 7 | 0 | 4 | 5 | 6 | 13 |
| 7 | 10 | 9 | 3 | 1 | 3 | 3 | 3 | 0 | 0 | 0 | 0 | 3 |
| 8 | 17 | 11 | 9 | 2 | 3 | 6 | 18 | 0 | 0 | 0 | 12 | 24 |
| 9 | 24 | 18 | 10 | 4 | 1 | 5 | 13 | 0 | 0 | 5 | 20 | 20 |
| 10 | 20 | 14 | 6 | 1 | 6 | 6 | 15 | 0 | 0 | 0 | 0 | 15 |
| 11 | 17 | 11 | 8 | 2 | 2 | 6 | 16 | 0 | 0 | 0 | 6 | 22 |
| 12 | 34 | 31 | 6 | 2 | 1 | 5 | 10 | 0 | 0 | 0 | 4 | 11 |
| 13 | 18 | 14 | 7 | 3 | 1 | 5 | 10 | 0 | 0 | 1 | 8 | 12 |
| 14 | 8 | 6 | 2 | 1 | 2 | 2 | 1 | 0 | 0 | 0 | 0 | 1 |
| 15 | 18 | 14 | 6 | 4 | 1 | 3 | 3 | 0 | 0 | 3 | 6 | 6 |
| 16 | 32 | 24 | 9 | 2 | 1 | 7 | 21 | 0 | 0 | 0 | 7 | 29 |
| 17 | 16 | 14 | 7 | 2 | 2 | 5 | 11 | 0 | 0 | 0 | 8 | 13 |
| 18 | 11 | 8 | 3 | 2 | 1 | 2 | 1 | 0 | 0 | 0 | 1 | 2 |
| 19 | 11 | 9 | 2 | 1 | 2 | 2 | 1 | 0 | 0 | 0 | 0 | 1 |
| 20 | 17 | 11 | 7 | 3 | 2 | 3 | 5 | 0 | 0 | 6 | 5 | 10 |
| 21 | 23 | 20 | 8 | 3 | 1 | 5 | 11 | 0 | 0 | 2 | 12 | 14 |
| 22 | 14 | 7 | 6 | 4 | 1 | 2 | 2 | 0 | 1 | 3 | 5 | 6 |
| 23 | 23 | 16 | 10 | 3 | 3 | 4 | 12 | 0 | 0 | 12 | 14 | 19 |
| 24 | 14 | 9 | 5 | 1 | 4 | 4 | 6 | 0 | 0 | 0 | 0 | 10 |
| 25 | 34 | 25 | 12 | 4 | 1 | 5 | 14 | 8 | 0 | 11 | 24 | 23 |
| 26 | 12 | 10 | 7 | 1 | 7 | 7 | 21 | 0 | 0 | 0 | 0 | 21 |
| 27 | 32 | 21 | 5 | 3 | 1 | 2 | 2 | 0 | 0 | 8 | 0 | 2 |
| 28 | 18 | 10 | 8 | 3 | 1 | 4 | 9 | 0 | 0 | 3 | 12 | 13 |
| 29 | 16 | 14 | 4 | 1 | 4 | 4 | 6 | 0 | 0 | 0 | 0 | 6 |
| 30 | 19 | 12 | 9 | 4 | 1 | 3 | 5 | 7 | 2 | 8 | 12 | 7 |
| 31 | 19 | 12 | 5 | 3 | 1 | 3 | 3 | 0 | 0 | 3 | 4 | 3 |
| 32 | 18 | 10 | 9 | 3 | 1 | 7 | 15 | 0 | 0 | 3 | 16 | 17 |
| 33 | 17 | 14 | 6 | 3 | 1 | 3 | 4 | 0 | 0 | 2 | 6 | 7 |
| 34 | 20 | 16 | 7 | 4 | 1 | 2 | 3 | 0 | 4 | 6 | 4 | 7 |
| 35 | 9 | 8 | 4 | 2 | 2 | 2 | 2 | 0 | 0 | 0 | 2 | 4 |
| 36 | 12 | 8 | 4 | 3 | 1 | 2 | 1 | 0 | 0 | 1 | 2 | 3 |
| 37 | 14 | 12 | 7 | 2 | 3 | 4 | 9 | 0 | 0 | 0 | 9 | 12 |
| 38 | 15 | 10 | 6 | 3 | 1 | 3 | 4 | 0 | 0 | 6 | 5 | 4 |
| 39 | 7 | 7 | 5 | 1 | 4 | 4 | 6 | 0 | 0 | 0 | 0 | 10 |
| 40 | 12 | 8 | 7 | 3 | 1 | 4 | 7 | 0 | 0 | 3 | 8 | 10 |
| 41 | 9 | 7 | 6 | 2 | 1 | 5 | 10 | 0 | 0 | 0 | 4 | 11 |
| 42 | 25 | 16 | 10 | 5 | 1 | 5 | 11 | 0 | 2 | 11 | 17 | 15 |
| 43 | 13 | 9 | 9 | 3 | 1 | 6 | 16 | 0 | 0 | 2 | 15 | 19 |
| Total | 736 | 534 | 272 |  |  |  | 336 | 15 | 13 | 112 | 256 | 447 |

| Type of Affected Pairs | Count | Kinship |
| --- | --- | --- |
| Sib Pairs | 336 | 8/32 |
| Parent-child Pairs | 111 | 8/32 |
| Halfsib pairs | 6 | 4/32 |
| Avuncular Pairs | 239 | 4/32 |
